# Supplementary material for: Activity of Novel Ultrashort Cyclic Lipopeptides against Biofilm of Candida albicans Isolated from VVC in the Ex Vivo Animal Vaginal Model and BioFlux Biofilm Model—A Pilot Study
Source: MDPI journal article supplement (doi:10.3390/ijms232214453), 2022-11-21
Supplement: s1 [file s1]

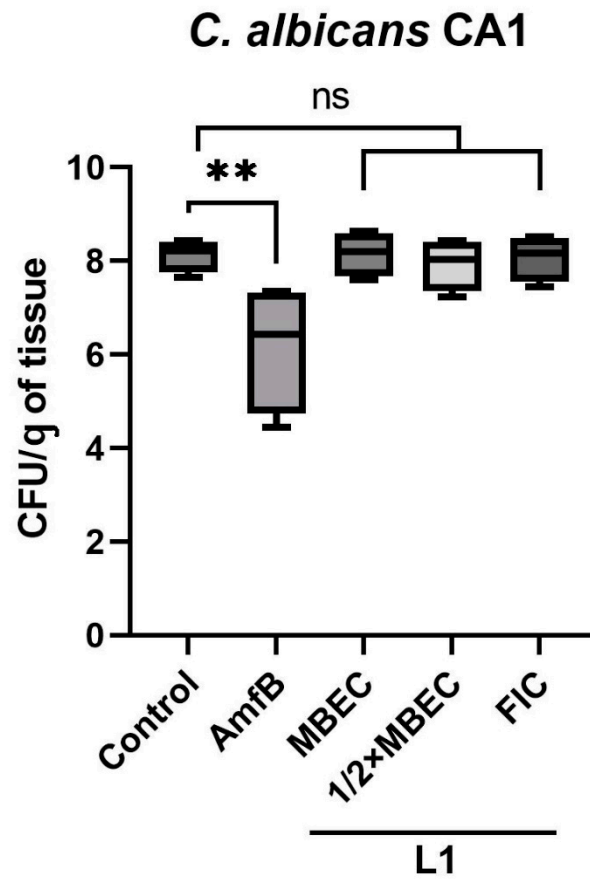

**Figure S1.** Distribution of CFU per gram of tissue values obtained for strain CA1. Control is referred to as a positive control (untreated biofilm of *C. albicans*). Biofilms were treated with: AmfB – amphotericin B (50 µg/mL), lipopeptide L1 at a concentration equal to MBEC, ½ MBEC and FIC values (MBEC – minimum biofilm eradication concentration; FIC – fractional inhibitory concentration). NS – non significant results ( $p > 0.05$ ), \*/\*\* - results with statistical significance ( $p < 0.05$ ).

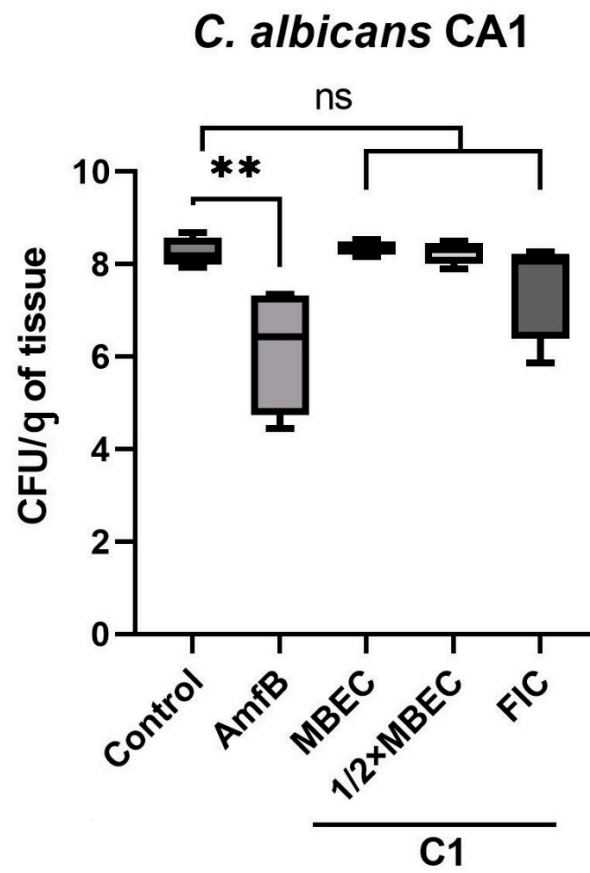

**Figure S2.** Distribution of CFU per gram of tissue values obtained for strain CA1. Control is referred to as a positive control (untreated biofilm of *C. albicans*). Biofilms were treated with: AmfB – amphotericin B (50 µg/mL), lipopeptide C1 at a concentration equal to MBEC, ½ MBEC and FIC values (MBEC – minimum biofilm eradication concentration; FIC – fractional inhibitory concentration). NS – non significant results ( $p > 0.05$ ), \*/\*\* - results with statistical significance ( $p < 0.05$ ).

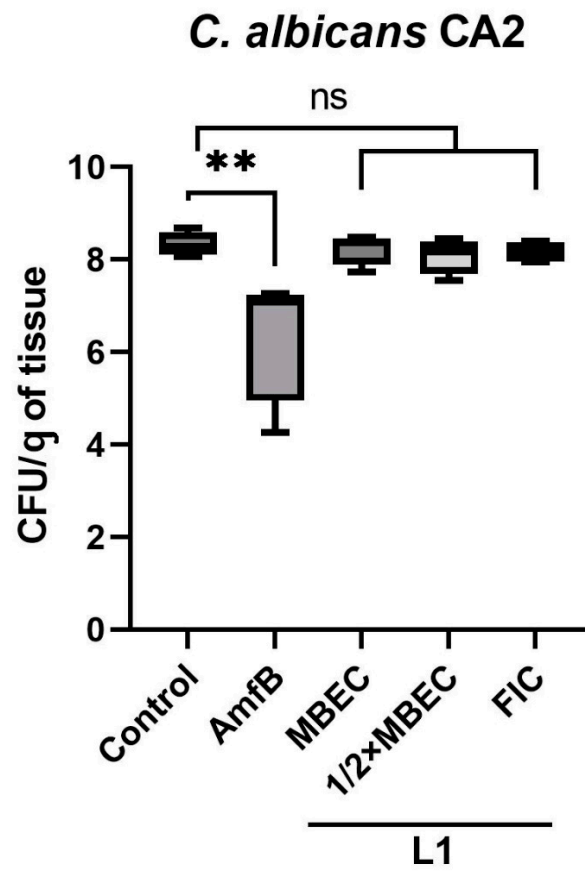

**Figure S3.** Distribution of CFU per gram of tissue values obtained for strain CA2. Control is referred to as a positive control (untreated biofilm of *C. albicans*). Biofilms were treated with: AmfB – amphotericin B (50 µg/mL), lipopeptide L1 at a concentration equal to MBEC, ½ MBEC and FIC values (MBEC – minimum biofilm eradication concentration; FIC – fractional inhibitory concentration). NS – non significant results ( $p > 0.05$ ), \*/\*\* - results with statistical significance ( $p < 0.05$ ).

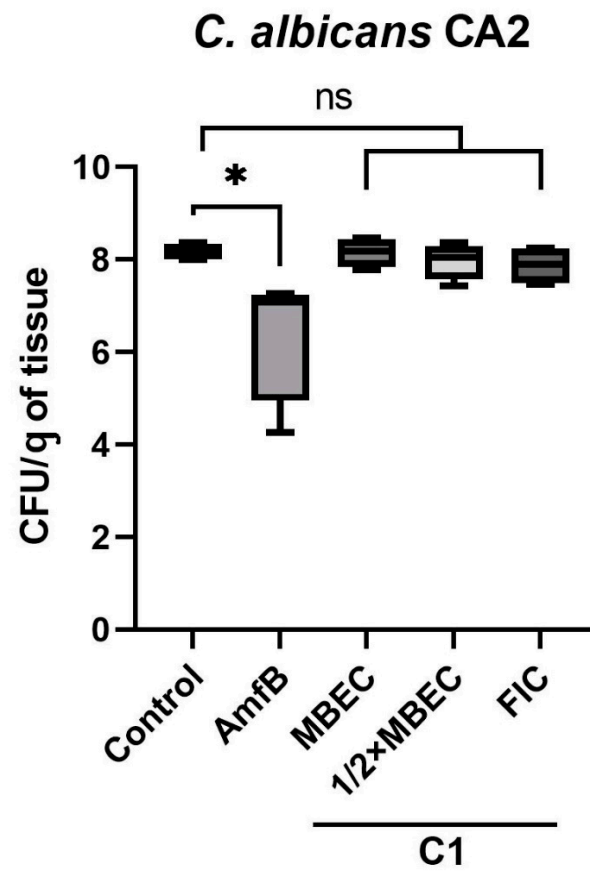

**Figure S4.** Distribution of CFU per gram of tissue values obtained for strain CA2. Control is referred to as a positive control (untreated biofilm of *C. albicans*). Biofilms were treated with: AmfB – amphotericin B (50 µg/mL), lipopeptide C1 at a concentration equal to MBEC, ½ MBEC and FIC values (MBEC – minimum biofilm eradication concentration; FIC – fractional inhibitory concentration). NS – non significant results ( $p > 0.05$ ), \*/\*\* - results with statistical significance ( $p < 0.05$ ).
